# Supplementary material
Source: PubMed Central journal article supplement (PMC6802260)
Supplement: jama-322-1476-s003.pdf [file jama-322-1476-s003.pdf]

## Supplementary Online Content 3

Laterre P-F, Berry SM, Blemings A, et al; SEPSIS-ACT Investigators. Effect of selepressin vs placebo on ventilator- and vasopressor-free days in patients with septic shock: the SEPSIS-ACT randomized clinical trial. *JAMA*. doi:10.1001/jama.2019.14607

### Data Sharing Statement

#### Data

**Data available:** Yes

**Data types:** Other (please specify)

**Additional Information:** A copy of the raw data used to compile the official dataset will be provided to regulatory authorities upon potential submission for new drug application. In accordance with the data protection clauses of the informed consent form of the trial, individual de-identified data will not be made available through repositories or websites.

**How to access data:** Requests for results of additional analysis incl. plan for use of the results may be submitted to Nis Agerlin Windeløv, Medical Director Ferring Pharmaceuticals ([nwn@ferring.com](mailto:nwn@ferring.com)) and will be evaluated by the sponsor and the trial steering committee.

**When available:** beginning date: 09-01-2020

### Supporting Documents

**Document types:** None

### Additional Information

**Who can access the data:** Data may be made available following evaluation by the sponsor and the trial steering committee.

**Types of analyses:** To be determined following evaluation by the sponsor and the trial steering committee.

**Mechanisms of data availability:** Following evaluation by the sponsor and the trial steering committee, with execution of any necessary agreements.
